# Supplementary material
Source: Royal Society of Chemistry journal article supplement (doi:10.1039/d6ob00152a)
Supplement: d6ob00152a1.pdf [file d6ob00152a1.pdf]

## Synthesis of 2-aminobenzothiazole substituted indole via DBU catalyzed addition of indole and benzothiazolimine

<sup>a</sup>Xiang-jia Song, <sup>a</sup>Ya-xiong Wang, <sup>a</sup>Xin-sheng Geng, <sup>a</sup>Jing-jing, Zhang, <sup>b,c</sup> Yu Yang, <sup>b</sup>Min-min Zhang, <sup>a</sup>Ning-ning Zhao\*, <sup>a</sup>Hong-feng Yu\*

\*E-mail: songxiangjia2006@ncst.edu.cn

a. College of Chemical Engineering, North China University of Science and Technology, Tangshan 063210, China.

b. Lunan Pharmaceutical Group Co., Ltd., Linyi 276005, China.

c. Taishan University, Taian 271000, China.

### Supporting Information

#### Table of Contents

|                                                                                          |    |
|------------------------------------------------------------------------------------------|----|
| 1. General Information .....                                                             | 2  |
| 2. Experimental Procedures .....                                                         | 2  |
| 3. Preliminary reaction condition optimization for Mannich reaction .....                | 3  |
| 4. Crystallographic Information for 2-aminobenzothiazole <b>3ia</b> (CCDC 2301432) ..... | 5  |
| 5. <sup>1</sup> H and <sup>13</sup> C NMR data for all compound .....                    | 7  |
| 6. <sup>1</sup> H and <sup>13</sup> C NMR spectra for all compounds .....                | 14 |

# 1. General Information

Chemicals were purchased from commercial suppliers and used without further purification unless otherwise stated. Reactions were monitored by TLC and visualized with ultraviolet light. Flash column chromatography was performed on silica gels (300-400 mesh) eluting with ethyl acetate, dichloromethane and petroleum ether. <sup>1</sup>H NMR and <sup>13</sup>C NMR spectra were recorded on Bruker Avance (400MHz for <sup>1</sup>H NMR, 100MHz and for <sup>13</sup>C NMR) instruments. Data for <sup>1</sup>H NMR are reported as chemical shift (ppm, tetramethylsilane as the internal standard), integration, multiplicity (s = singlet, d = doublet, t = triplet, q = quartet, m = multiplet), coupling constant (Hz). Data for <sup>13</sup>C NMR are reported as chemical shift. Flash column chromatography was carried out using silica gel eluting with ethyl acetate and petroleum ether. High-resolution mass spectra (HRMS) analyses were obtained with the Bruker Solari X 70 Fourier-transform mass spectrometer. Reactions were monitored by TLC and visualized with ultraviolet light. Melting points were recorded on a Buchi Melting Point B-545.

## 2. Experimental Procedures

### 2.1. Typical Procedure for the Synthesis of benzothiazolimes 1.

Benzothiazolimes<sup>1</sup> were prepared as reported procedures. Unless otherwise noted, materials were purchased from commercial suppliers and used without further purification.

### 2.2. General procedure for the synthesis of 3

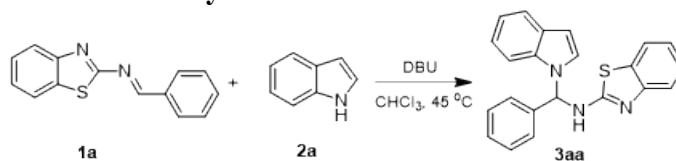

To a reaction tube equipped (15.0 mL) with a stirrer were added **1a** (28.6 mg, 0.12 mmol), **2a** (11.7 mg, 0.1 mmol), 1.0 equiv. DBU and CHCl<sub>3</sub> (1.0 mL). The tube was then sealed, and the mixture was stirred at 45 °C under air until the reaction was completed. The mixture was evaporated and purified by silica gel column chromatography using petroleum ether/ethyl acetate (15/1-10/1) as eluent to afford **3aa** (30.2 mg). Other products were obtained in a similar manner.

### 2.3. Scale-up preparation and representative transformation of product 3a

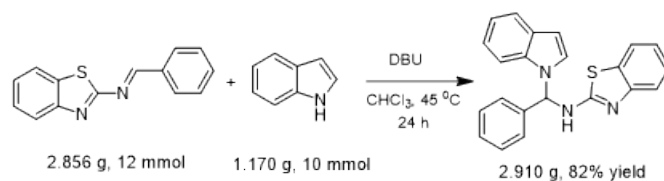

A solution of benzothiazolimine **1a** (2.856 g, 12.0 mmol, 1.2 equiv.), indol **2a** (1.170 g, 10 mmol, 1.0 equiv.), 1.0 equiv. DBU and CHCl<sub>3</sub> (1.0 mL). The tube was stirred at 45 °C. After indol **2a** was consumed monitored by TLC, the solvent was evaporated and the mixture was directly purified by column chromatography on silica gel eluting with petroleum ether/ethyl acetate to afford product **3aa**.

#### Reference

[1] Q.-J. Ni, X.-X. Song, J.-W. Xiong, G. Raabe, and D. Enders. *Chem. Commun.*, 2015, 51, 1263.

### 3. Preliminary reaction condition optimization for Mannich reaction

Table S1 Screenings of solvent<sup>a</sup>

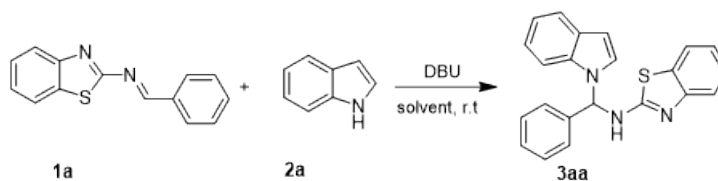

| Entry <sup>a</sup> | Solvent                         | Time (h) | Yield <sup>b</sup> (%) |
|--------------------|---------------------------------|----------|------------------------|
| 1                  | CH <sub>2</sub> Cl <sub>2</sub> | 48       | 60                     |
| 2                  | CHCl <sub>3</sub>               | 48       | 64                     |
| 3                  | DCE                             | 48       | 40                     |
| 4                  | MeCN                            | 44       | 44                     |
| 5                  | DMF                             | 72       | nd <sup>c</sup>        |
| 6                  | DMSO                            | 72       | nd <sup>c</sup>        |
| 7                  | CH <sub>3</sub> OH              | 72       | nd <sup>c</sup>        |
| 8                  | Toluene                         | 168      | 35                     |
| 9                  | THF                             | 168      | 44                     |
| 10                 | EA                              | 168      | 40                     |
| 11                 | MTBE                            | 72       | 38                     |
| 12                 | 1,4-Dioxane                     | 72       | 52                     |
| 13                 | Hexane                          | 168      | nd <sup>c</sup>        |
| 14                 | H <sub>2</sub> O                | 168      | nr <sup>d</sup>        |

<sup>a</sup>Unless otherwise specified, the reaction was performed with 0.15mmol **1a**, 0.1 mmol **2a** and 20 mol% catalyst in 1.0 mL solvent at room temperature. <sup>b</sup>Isolated yields. <sup>c</sup>No determined. <sup>d</sup>No reaction

**Table S2** Further Optimization of Reaction Conditions<sup>a</sup>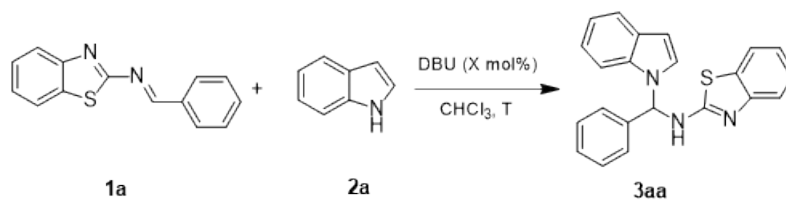

| Entry <sup>a</sup> | <b>1a:2a</b> | T/°C   | X   | T/h | Yield <sup>b</sup> (%) |
|--------------------|--------------|--------|-----|-----|------------------------|
| 1                  | 1.5:1        | r.t    | 20  | 48  | 64                     |
| 2                  | 1.5:1        | r.t    | 50  | 48  | 67                     |
| 3                  | 1.5:1        | r.t    | 100 | 48  | 80                     |
| 4                  | 1.5:1        | r.t    | 150 | 48  | 80                     |
| 5                  | 1.5:1        | r.t    | 200 | 48  | 78                     |
| 6                  | 1:1          | r.t    | 100 | 48  | 72                     |
| 7                  | 1.2:1        | r.t    | 100 | 48  | 80                     |
| 8                  | 2.0:1        | r.t    | 100 | 48  | 78                     |
| 9                  | 1.2:1        | r.t    | 100 | 48  | 76                     |
| 10                 | 1.2:1        | r.t    | 100 | 48  | 80                     |
| 11                 | 1.2:1        | 45     | 100 | 24  | 85                     |
| 12                 | 1.2:1        | reflux | 100 | 16  | 81                     |

<sup>a</sup>Unless otherwise specified, the reaction was performed with 0.15mmol **1a**, 0.1 mmol **2a** and 20 mol% catalyst in 1.0 mL CHCl<sub>3</sub> at room temperature. <sup>b</sup>Isolated yields.

#### 4. Crystallographic Information for 2-aminobenzothiazole 3ia (CCDC 2301432)

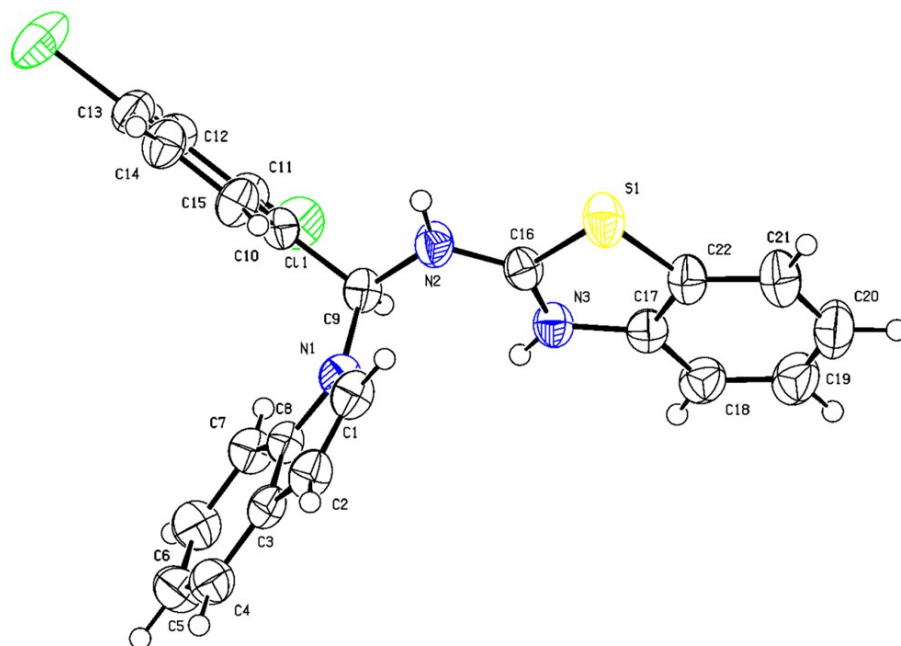

**Figure S1.** ORTEP plot of compound **3ia**  
Thermal ellipsoids are drawn at 30% probability level.

**Table S3** Important crystal data of compound **3ia**

|                                             |                                                                  |
|---------------------------------------------|------------------------------------------------------------------|
| Empirical formula                           | C <sub>22</sub> H <sub>16</sub> Cl <sub>2</sub> N <sub>3</sub> S |
| Formula weight                              | 425.34                                                           |
| Temperature/K                               | 293(2)                                                           |
| Crystal system                              | monoclinic                                                       |
| Space group                                 | P2 <sub>1</sub> /c                                               |
| a/Å                                         | 8.5113(9)                                                        |
| b/Å                                         | 22.4784(19)                                                      |
| c/Å                                         | 10.1545(9)                                                       |
| α/°                                         | 90                                                               |
| β/°                                         | 99.787(9)                                                        |
| γ/°                                         | 90                                                               |
| Volume/Å <sup>3</sup>                       | 1914.5(3)                                                        |
| Z                                           | 4                                                                |
| ρ <sub>calc</sub> /cm <sup>3</sup>          | 1.476                                                            |
| μ/mm <sup>-1</sup>                          | 0.462                                                            |
| F(000)                                      | 876.0                                                            |
| Crystal size/mm <sup>3</sup>                | 0.16 × 0.1 × 0.08                                                |
| Radiation                                   | Mo Kα (λ = 0.71073)                                              |
| 2Θ range for data collection/°              | 4.456 to 61.108                                                  |
| Index ranges                                | -12 ≤ h ≤ 11, -32 ≤ k ≤ 31, -14 ≤ l ≤ 14                         |
| Reflections collected                       | 27664                                                            |
| Independent reflections                     | 5687 [R <sub>int</sub> = 0.0553, R <sub>sigma</sub> = 0.0544]    |
| Data/restraints/parameters                  | 5687/0/253                                                       |
| Goodness-of-fit on F <sup>2</sup>           | 1.029                                                            |
| Final R indexes [I >= 2σ (I)]               | R <sub>1</sub> = 0.0506, wR <sub>2</sub> = 0.1063                |
| Final R indexes [all data]                  | R <sub>1</sub> = 0.1013, wR <sub>2</sub> = 0.1234                |
| Largest diff. peak/hole / e Å <sup>-3</sup> | 0.24/-0.53                                                       |

## 5. <sup>1</sup>H and <sup>13</sup>C NMR data for all compound

### *N*-((1*H*-indol-1-yl)(phenyl)methyl)benzo[*d*]thiazol-2-amine (3aa)

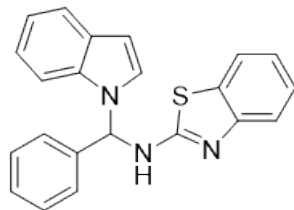

The target product **3aa** (30.2 mg, 85%) was synthesized as a white solid, mp: 164.0~165.1 °C. <sup>1</sup>H NMR (400 MHz, DMSO-*d*<sub>6</sub>) δ 9.49 (d, *J* = 8.2 Hz, 1H), 7.73 (d, *J* = 7.8 Hz, 1H), 7.66 (d, *J* = 8.2 Hz, 1H), 7.56 (d, *J* = 7.9 Hz, 2H), 7.48 (d, *J* = 3.2 Hz, 1H), 7.43 (d, *J* = 8.0 Hz, 1H), 7.4~7.29 (m, 5H), 7.24 (t, *J* = 7.3 Hz, 1H), 7.10 (dd, *J* = 16.0, 7.8 Hz, 2H), 7.06~6.98 (m, 1H), 6.52 (d, *J* = 3.2 Hz, 1H). <sup>13</sup>C NMR (100 MHz, DMSO-*d*<sub>6</sub>) δ 164.8, 151.7, 138.4, 135.2, 130.6, 128.7, 128.6, 128.4, 126.4, 126.1, 125.7, 121.8, 121.4, 120.6, 119.6, 118.8, 110.8, 101.7, 67.3. HRMS (ESI) *m/z* calcd for C<sub>22</sub>H<sub>18</sub>N<sub>3</sub>S<sup>+</sup> (M+H)<sup>+</sup> 356.1216, found 356.1218.

### *N*-((2-fluorophenyl)(1*H*-indol-1-yl)methyl)benzo[*d*]thiazol-2-amine (3ba)

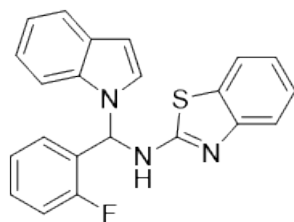

The target product **3ba** (30.6 mg, 82%) was synthesized as a white solid, mp: 168.2~169.3 °C. <sup>1</sup>H NMR (400 MHz, DMSO-*d*<sub>6</sub>) δ 9.56 (d, *J* = 7.9 Hz, 1H), 7.83 (d, *J* = 7.9 Hz, 1H), 7.74 (d, *J* = 7.5 Hz, 1H), 7.58 (d, *J* = 7.8 Hz, 1H), 7.52 (d, *J* = 8.2 Hz, 1H), 7.49~7.39 (m, 3H), 7.35~7.28 (m, 1H), 7.28~7.20 (m, 3H), 7.14 (t, *J* = 7.3 Hz, 1H), 7.09 (d, *J* = 7.8 Hz, 1H), 7.05 (d, *J* = 7.2 Hz, 1H), 6.53 (d, *J* = 3.0 Hz, 1H). <sup>13</sup>C NMR (100 MHz, DMSO-*d*<sub>6</sub>) δ 164.3, 151.5, 135.0, 131.0 (d, *J*<sub>C-F</sub> = 8.3 Hz), 130.6, 128.6, 127.6, 125.7 (d, *J*<sub>C-F</sub> = 15.2 Hz), 125.4 (d, *J*<sub>C-F</sub> = 13.2 Hz), 124.8 (d, *J*<sub>C-F</sub> = 3.4 Hz), 121.8 (d, *J*<sub>C-F</sub> = 16.2 Hz), 121.2, 120.7, 119.8, 118.9, 116.0, 115.8, 110.2, 102.0, 62.0 (d, *J*<sub>C-F</sub> = 3.9 Hz). HRMS (ESI) *m/z* calcd for C<sub>22</sub>H<sub>16</sub>FN<sub>3</sub>SNa<sup>+</sup> (M+Na)<sup>+</sup> 396.0941, found 396.0944.

### *N*-((2-chlorophenyl)(1*H*-indol-1-yl)methyl)benzo[*d*]thiazol-2-amine (3ca)

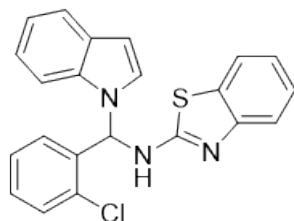

The target product **3ca** (31.5 mg, 81%) was synthesized as a white solid, mp: 156.1~157.5 °C. <sup>1</sup>H NMR (400 MHz, DMSO-*d*<sub>6</sub>) δ 9.51 (d, *J* = 7.0 Hz, 1H), 7.81 (d, *J* = 7.6 Hz, 1H), 7.74 (d, *J* = 7.8 Hz, 1H), 7.59 (d, *J* = 8.0 Hz, 2H), 7.43 (ddd, *J* = 10.6, 9.2, 6.0 Hz, 3H), 7.37 (d, *J* = 7.6 Hz, 1H), 7.31 (d, *J* = 3.3 Hz, 1H), 7.25 (t, *J* = 7.4 Hz, 1H), 7.19 (d, *J* = 7.0 Hz, 1H), 7.17~7.08 (m, 2H), 7.06 (d, *J* = 7.0 Hz, 1H), 6.54 (d, *J* = 3.1 Hz, 1H). <sup>13</sup>C NMR (100 MHz, DMSO-*d*<sub>6</sub>) δ 164.3, 151.6, 135.5, 133.6, 130.6, 130.0, 128.1, 127.7, 127.6, 125.7, 125.5, 121.9, 121.8, 121.2, 120.8, 119.9, 119.0,

110.1, 102.0, 64.8. HRMS (ESI)  $m/z$  calcd for  $C_{22}H_{16}ClN_3SNa^+$  ( $M+Na$ ) $^+$  412.06457, found 412.06461.

***N*-((2-bromophenyl)(1*H*-indol-1-yl)methyl)benzo[*d*]thiazol-2-amine (3da)**

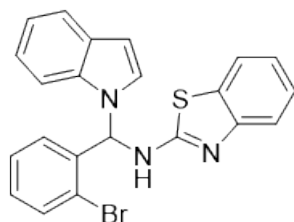

The target product **3da** (34.3 mg, 79%) was synthesized as a white solid, mp: 171.3~173.0 °C.  $^1H$  NMR (400 MHz,  $DMSO-d_6$ )  $\delta$  9.48 (d,  $J = 7.0$  Hz, 1H), 7.74 (dd,  $J = 17.1, 7.6$  Hz, 2H), 7.60 (d  $J = 8.0$ , 1H), 7.47 (d,  $J = 6.3$  Hz, 1H), 7.44 (s, 1H), 7.37 (dd,  $J = 9.4, 4.9$  Hz, 3H), 7.29 (d,  $J = 3.3$  Hz, 1H), 7.24 (t,  $J = 7.2$  Hz, 1H), 7.18~7.12 (m, 2H), 7.10 (d,  $J = 7.1$  Hz, 1H), 7.06 (d,  $J = 6.7$  Hz, 1H), 6.54 (d,  $J = 3.1$  Hz, 1H).  $^{13}C$  NMR (100 MHz,  $DMSO-d_6$ )  $\delta$  164.3, 151.7, 137.0, 135.2, 133.3, 130.8, 130.6, 128.0, 128.2, 127.8, 125.7, 125.4, 123.0, 121.9, 121.2, 120.8, 119.9, 119.0, 110.1, 102.0, 67.1. HRMS (ESI)  $m/z$  calcd for  $C_{22}H_{16}BrN_3SNa^+$  ( $M+Na$ ) $^+$  456.0141, found 456.0140.

***N*-((3-fluorophenyl)(1*H*-indol-1-yl)methyl)benzo[*d*]thiazol-2-amine (3ea)**

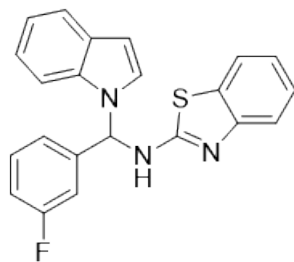

The target product **3ea** (28.0 mg, 75%) was synthesized as a white solid, mp: 192.3~193.0 °C.  $^1H$  NMR (400 MHz,  $DMSO-d_6$ )  $\delta$  9.52 (d,  $J = 8.1$  Hz, 1H), 7.72 (dd,  $J = 17.2, 8.0$  Hz, 2H), 7.58 (dd,  $J = 10.7, 8.3$  Hz, 2H), 7.51 (d,  $J = 3.2$  Hz, 1H), 7.48~7.40 (m, 2H), 7.25 (t,  $J = 5.8$  Hz, 1H), 7.22 (d,  $J = 9.5$  Hz, 1H), 7.19~7.13 (m, 3H), 7.11 (d,  $J = 5.2$  Hz, 1H), 7.06 (dd,  $J = 13.7, 6.3$  Hz, 2H), 6.53 (d,  $J = 3.2$  Hz, 1H).  $^{13}C$  NMR (100 MHz,  $DMSO-d_6$ )  $\delta$  164.6, 162.2 (d,  $J_{C-F} = 244.3$  Hz), 151.6, 141.2 (d,  $J_{C-F} = 7.0$  Hz), 135.1, 130.8 (d,  $J_{C-F} = 8.3$  Hz), 130.7, 128.6, 126.0, 125.7, 122.6, 121.9, 121.4, 121.2 (d,  $J_{C-F} = 12.0$  Hz), 119.7, 118.9, 115.40 (d,  $J_{C-F} = 21.0$  Hz), 113.47 (d,  $J_{C-F} = 22.8$  Hz), 110.8, 101.9, 66.8. HRMS (ESI)  $m/z$  calcd for  $C_{22}H_{16}FN_3SNa^+$  ( $M+Na$ ) $^+$  396.09412, found 396.09421.

***N*-((3-chlorophenyl)(1*H*-indol-1-yl)methyl)benzo[*d*]thiazol-2-amine (3fa)**

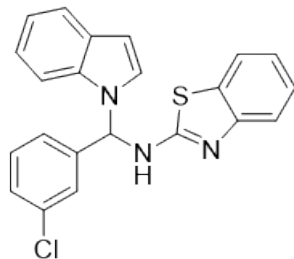

The target product **3fa** (30.0mg, 77%) was synthesized as a white solid, mp: 164.3~166.0 °C.  $^1H$  NMR (400 MHz,  $DMSO-d_6$ )  $\delta$  9.52 (d,  $J = 8.2$  Hz, 1H), 7.72 (dd,  $J = 11.9, 8.1$  Hz, 2H), 7.59 (dd,  $J = 11.1, 8.2$  Hz, 2H), 7.51 (d,  $J = 3.3$  Hz, 1H), 7.48~7.38 (m, 4H), 7.28 (dd,  $J = 5.3, 4.3$  Hz, 1H),

7.26~7.22 (m, 1H), 7.14 (t,  $J = 7.6$  Hz, 1H), 7.07 (dt,  $J = 15.2, 7.4$  Hz, 2H), 6.54 (d,  $J = 3.1$  Hz, 1H).  $^{13}\text{C}$  NMR (100 MHz, DMSO- $d_6$ )  $\delta$  164.6, 151.6, 140.8, 135.1, 133.4, 130.6, 128.6, 126.4, 126.0, 125.7, 125.3, 121.9, 121.6, 121.2, 120.7, 119.7, 118.9, 110.8, 102.0, 66.7. HRMS (ESI)  $m/z$  calcd for  $\text{C}_{16}\text{H}_{13}\text{FN}_2\text{OS}_2\text{Na}^+$  ( $\text{M}+\text{Na}$ ) $^+$  355.0345, found 355.0345.

***N*-((4-chlorophenyl)(1*H*-indol-1-yl)methyl)benzo[*d*]thiazol-2-amine (3ga)**

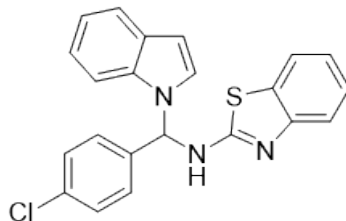

The target product **3ga** (31.5mg, 81%) was synthesized as a white solid, mp: 208.2~209.0 °C.  $^1\text{H}$  NMR (400 MHz, DMSO- $d_6$ )  $\delta$  9.50 (d,  $J = 8.0$  Hz, 1H), 7.73 (d,  $J = 7.7$  Hz, 1H), 7.67 (d,  $J = 7.9$  Hz, 1H), 7.56 (d,  $J = 7.9$  Hz, 2H), 7.47 (d,  $J = 8.7$  Hz, 3H), 7.43 (d,  $J = 8.1$  Hz, 1H), 7.33 (d,  $J = 8.0$  Hz, 2H), 7.24 (t,  $J = 7.5$  Hz, 1H), 7.11 (dd,  $J = 17.2, 8.0$  Hz, 2H), 7.07~7.01 (m, 1H), 6.53 (d,  $J = 1.9$  Hz, 1H).  $^{13}\text{C}$  NMR (100 MHz, DMSO- $d_6$ )  $\delta$  164.7, 151.6, 137.4, 135.0, 133.2, 130.6, 128.7, 128.4, 126.1, 125.7, 121.8, 121.5, 121.2, 120.6, 119.7, 118.9, 110.8, 101.9, 66.8. HRMS (ESI)  $m/z$  calcd for  $\text{C}_{22}\text{H}_{16}\text{ClN}_3\text{SNa}^+$  ( $\text{M}+\text{Na}$ ) $^+$  412.06457, found 412.06476.

***N*-((4-bromophenyl)(1*H*-indol-1-yl)methyl)benzo[*d*]thiazol-2-amine (3ha)**

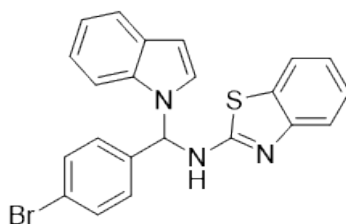

The target product **3ha** (34.6 mg, 80%) was synthesized as a white solid, mp: 183.3~185.0 °C.  $^1\text{H}$  NMR (400 MHz, DMSO- $d_6$ )  $\delta$  9.50 (d,  $J = 7.7$  Hz, 1H), 7.74 (d,  $J = 7.9$  Hz, 1H), 7.63~7.54 (m, 4H), 7.51~7.46 (m, 1H), 7.41 (dd,  $J = 17.4, 10.1$  Hz, 1H), 7.36~7.32 (m, 1H), 7.26 (d,  $J = 8.0$  Hz, 3H), 7.08 (dd,  $J = 9.8, 5.2$  Hz, 2H), 7.04 (d,  $J = 8.8$  Hz, 1H), 6.53 (d,  $J = 2.9$  Hz, 1H).  $^{13}\text{C}$  NMR (100 MHz, DMSO- $d_6$ )  $\delta$  165.1, 152.1, 138.3, 135.5, 134.1, 132.8, 132.2, 131.1, 129.2, 127.2, 126.2, 125.7, 122.0, 121.7, 121.2, 120.4, 119.3, 111.3, 102.4, 67.3. HRMS (ESI)  $m/z$  calcd for  $\text{C}_{22}\text{H}_{16}\text{BrN}_3\text{SNa}^+$  ( $\text{M}+\text{Na}$ ) $^+$  456.0140, found 456.0139.

***N*-((2,4-dichlorophenyl)(1*H*-indol-1-yl)methyl)benzo[*d*]thiazol-2-amine (3ia)**

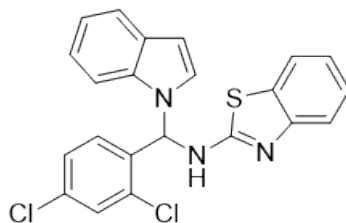

The target product **3ia** (28.4 mg, 67%) was synthesized as a white solid, mp: 183.3~185.0 °C.  $^1\text{H}$  NMR (400 MHz, DMSO- $d_6$ )  $\delta$  9.51 (d,  $J = 6.7$  Hz, 1H), 7.80~7.71 (m, 3H), 7.60 (d,  $J = 7.9$  Hz, 1H), 7.54~7.45 (m, 3H), 7.42 (d,  $J = 8.3$  Hz, 1H), 7.33 (d,  $J = 3.0$  Hz, 1H), 7.25 (t,  $J = 7.7$  Hz, 1H), 7.16 (t,  $J = 9.3$  Hz, 2H), 7.10 (d,  $J = 7.0$  Hz, 1H), 7.07 (d,  $J = 6.9$  Hz, 1H), 6.55 (d,  $J = 3.2$  Hz, 1H).  $^{13}\text{C}$  NMR (100 MHz, DMSO- $d_6$ )  $\delta$  164.2, 151.6, 135.1, 134.6, 134.4, 133.6, 130.6, 129.5, 129.0,

128.7, 127.9, 125.8, 125.5, 121.9, 121.3, 120.9, 119.0, 110.1, 102.2, 64.5. HRMS (ESI)  $m/z$  calcd for  $C_{22}H_{15}Cl_2N_3SNa^+$  ( $M+Na$ ) $^+$  446.0256, found 446.0251.

***N*-((1*H*-indol-1-yl)(2-methoxyphenyl)methyl)benzo[*d*]thiazol-2-amine (3ja)**

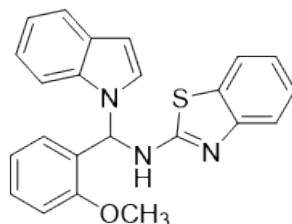

The target product **3ja** (34.7 mg, 90%) was synthesized as a white solid, mp: 183.3~185.0 °C.  $^1H$  NMR (400 MHz,  $DMSO-d_6$ )  $\delta$  9.37 (d,  $J = 8.1$  Hz, 1H), 7.81 (d,  $J = 8.1$  Hz, 1H), 7.72 (d,  $J = 7.7$  Hz, 1H), 7.55 (d,  $J = 7.8$  Hz, 1H), 7.45 (t,  $J = 7.3$  Hz, 2H), 7.41~7.35 (m, 1H), 7.32 (d,  $J = 3.3$  Hz, 1H), 7.23 (t,  $J = 7.7$  Hz, 2H), 7.1~7.08 (m, 2H), 7.04 (dd,  $J = 14.7, 7.2$  Hz, 2H), 6.97 (t,  $J = 7.5$  Hz, 1H), 6.46 (d,  $J = 3.2$  Hz, 1H), 3.81 (s, 3H).  $^{13}C$  NMR (100 MHz,  $DMSO-d_6$ )  $\delta$  165.0, 156.9, 152.2, 135.6, 131.0, 130.7, 129.1, 127.2, 126.4, 126.2, 126.0, 122.2, 121.9, 121.7, 121.1, 120.9, 120.0, 119.3, 112.0, 110.8, 101.7, 62.7, 56.3. HRMS (ESI)  $m/z$  calcd for  $C_{23}H_{19}N_3OSNa^+$  ( $M+Na$ ) $^+$  408.1141, found 408.1142.

***N*-((1*H*-indol-1-yl)(*p*-tolyl)methyl)benzo[*d*]thiazol-2-amine (3ka)**

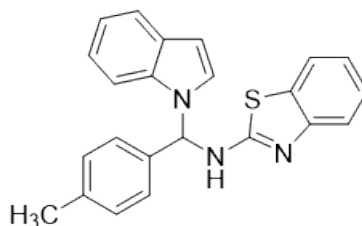

The target product **3ka** (32.1 mg, 87%) was synthesized as a white solid, mp: 183.3~185.0 °C.  $^1H$  NMR (400 MHz,  $DMSO-d_6$ )  $\delta$  9.45 (d,  $J = 8.2$  Hz, 1H), 7.72 (d,  $J = 7.8$  Hz, 1H), 7.61 (d,  $J = 8.1$  Hz, 1H), 7.54 (dd,  $J = 11.6, 5.6$  Hz, 2H), 7.46 (d,  $J = 3.2$  Hz, 1H), 7.42 (t,  $J = 8.1$  Hz, 2H), 7.23 (d,  $J = 2.7$  Hz, 1H), 7.20 (d,  $J = 2.9$  Hz, 4H), 7.13~7.08 (m, 2H), 7.08~6.99 (m, 1H), 6.50 (d,  $J = 3.1$  Hz, 1H), 2.28 (s, 3H).  $^{13}C$  NMR (100 MHz,  $DMSO-d_6$ )  $\delta$  164.7, 151.7, 137.8, 135.4, 135.1, 130.6, 130.2, 129.8, 129.2, 128.6, 126.4, 126.1, 125.7, 125.1, 121.7, 121.3, 120.6, 119.5, 118.7, 110.8, 101.5, 67.2, 20.6. HRMS (ESI)  $m/z$  calcd for  $C_{23}H_{19}N_3SNa^+$  ( $M+Na$ ) $^+$  392.1192, found 392.1191.

***N*-((1*H*-indol-1-yl)(thiophen-2-yl)methyl)benzo[*d*]thiazol-2-amine (3la)**

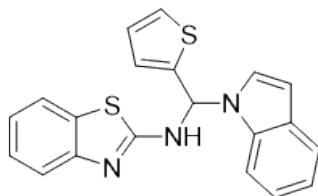

The target product **3la** (20.9 mg, 58%) was synthesized as a white solid, mp: 205.5~206.8 °C.  $^1H$  NMR (400 MHz,  $DMSO-d_6$ )  $\delta$  9.65 (d,  $J = 8.3$  Hz, 1H), 7.91 (dd,  $J = 13.6, 8.3$  Hz, 1H), 7.74 (d,  $J = 7.7$  Hz, 1H), 7.66 (d,  $J = 8.2$  Hz, 1H), 7.61~7.49 (m, 3H), 7.45 (d,  $J = 7.9$  Hz, 1H), 7.26 (t,  $J = 7.6$  Hz, 1H), 7.15 (t,  $J = 7.4$  Hz, 1H), 7.12~7.01 (m, 3H), 7.01~6.96 (m, 1H), 6.53 (d,  $J = 3.1$  Hz, 1H).  $^{13}C$  NMR (100 MHz,  $DMSO-d_6$ )  $\delta$  171.5, 160.5, 151.8, 142.4, 138.8, 135.8, 135.5, 129.7, 129.1, 127.5, 127.2, 126.5, 125.6, 122.4, 121.7, 120.5, 119.3, 111.8, 101.4, 64.5. HRMS (ESI)  $m/z$  calcd for  $C_{20}H_{15}N_3S_2Na^+$  ( $M+Na$ ) $^+$  384.0600, found 384.0600.

***N*-((1*H*-indol-1-yl)(phenyl)methyl)-6-chlorobenzo[*d*]thiazol-2-amine (3ma)**

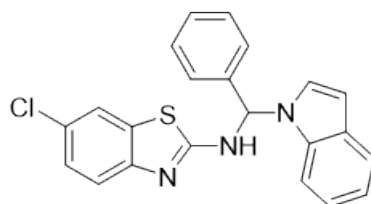

The target product **3ma** (27.2 mg, 70%) was synthesized as a white solid, mp: 178.5~179.0 °C. <sup>1</sup>H NMR (400 MHz, DMSO-*d*<sub>6</sub>) δ 9.62 (d, *J* = 8.0 Hz, 1H), 7.88 (d, *J* = 2.1 Hz, 1H), 7.64 (d, *J* = 7.6 Hz, 1H), 7.60~7.52 (m, 2H), 7.48 (d, *J* = 3.2 Hz, 1H), 7.44~7.36 (m, 4H), 7.32 (d, *J* = 7.9 Hz, 2H), 7.26 (dd, *J* = 8.6, 2.2 Hz, 1H), 7.12 (t, *J* = 7.7 Hz, 1H), 7.05 (t, *J* = 7.4 Hz, 1H), 6.53 (d, *J* = 3.0 Hz, 1H). <sup>13</sup>C NMR (100 MHz, DMSO-*d*<sub>6</sub>) δ 165.9, 151.1, 138.7, 135.6, 132.8, 129.2, 129.0, 126.9, 126.5, 126.4, 126.1, 122.0, 121.4, 121.1, 120.2, 120.1, 111.3, 102.2, 67.8. HRMS (ESI) *m/z* calcd for C<sub>22</sub>H<sub>16</sub>ClN<sub>3</sub>SNa<sup>+</sup> (M+Na)<sup>+</sup> 412.0646, found 412.0648.

***N*-((1*H*-indol-1-yl)(phenyl)methyl)-6-methoxybenzo[*d*]thiazol-2-amine (3na)**

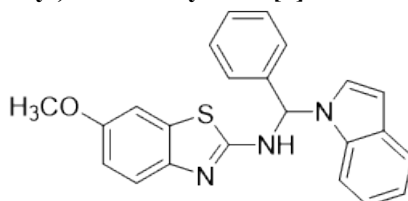

The target product **3na** (31.6 mg, 82%) was synthesized as a white solid, mp: 178.5~179.0 °C. <sup>1</sup>H NMR (400 MHz, DMSO-*d*<sub>6</sub>) δ 9.28 (d, *J* = 8.2 Hz, 1H), 7.68~7.64 (m, 1H), 7.55 (t, *J* = 8.4 Hz, 3H), 7.49 (d, *J* = 3.1 Hz, 1H), 7.39 (s, 1H), 7.36 (d, *J* = 2.7 Hz, 2H), 7.33~7.30 (m, 2H), 7.12~7.07 (m, 1H), 7.06~6.96 (m, 2H), 6.84 (dd, *J* = 8.8, 2.5 Hz, 1H), 6.51 (d, *J* = 3.0 Hz, 1H), 3.73 (s, 3H). <sup>13</sup>C NMR (100 MHz, DMSO-*d*<sub>6</sub>) δ 166.2, 154.9, 138.5, 135.1, 131.7, 129.9, 129.1, 128.5, 126.4, 126.0, 123.3, 121.4, 120.8, 120.6, 120.0, 119.5, 119.2, 113.3, 110.8, 101.6, 67.4, 55.5. HRMS (ESI) *m/z* calcd for C<sub>23</sub>H<sub>19</sub>N<sub>3</sub>OSNa<sup>+</sup> (M+Na)<sup>+</sup> 408.1141, found 408.1141.

***N*-((5-chloro-1*H*-indol-1-yl)(phenyl)methyl)benzo[*d*]thiazol-2-amine (3ab)**

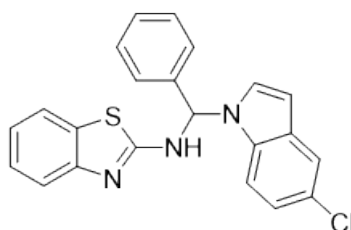

The target product **3ab** (25.3 mg, 65%) was synthesized as a white solid, mp: 188.0~189.0 °C. <sup>1</sup>H NMR (400 MHz, DMSO-*d*<sub>6</sub>) δ 9.53 (d, *J* = 8.1 Hz, 1H), 7.75 (d, *J* = 7.8 Hz, 1H), 7.66 (d, *J* = 8.2 Hz, 1H), 7.62 (d, *J* = 8.7 Hz, 2H), 7.59 (d, *J* = 3.2 Hz, 1H), 7.39 (dt, *J* = 13.7, 5.8 Hz, 4H), 7.31 (d, *J* = 7.0 Hz, 2H), 7.25 (t, *J* = 7.6 Hz, 1H), 7.14 (dd, *J* = 8.8, 1.8 Hz, 1H), 7.09 (t, *J* = 7.7 Hz, 1H), 6.53 (d, *J* = 3.1 Hz, 1H). <sup>13</sup>C NMR (100 MHz, DMSO-*d*<sub>6</sub>) δ 165.1, 152.3, 138.5, 134.0, 130.6, 130.3, 129.7, 129.2, 129.1, 128.4, 126.9, 126.2, 124.8, 122.4, 121.9, 121.8, 120.3, 119.3, 112.9, 101.9, 68.0. HRMS (ESI) *m/z* calcd for C<sub>22</sub>H<sub>16</sub>ClN<sub>3</sub>SNa<sup>+</sup> (M+Na)<sup>+</sup> 412.0646, found 412.0647.

***N*-((6-bromo-1*H*-indol-1-yl)(phenyl)methyl)benzo[*d*]thiazol-2-amine (3ac)**

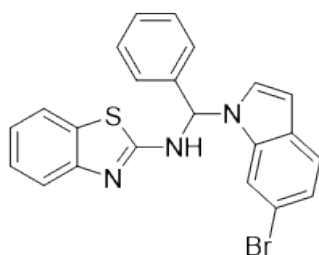

The target product **3ac** (23.8 mg, 55%) was synthesized as a white solid, mp: 188.0~189.0 °C. <sup>1</sup>H NMR (400 MHz, DMSO-*d*<sub>6</sub>) δ 9.52 (d, *J* = 8.1 Hz, 1H), 7.90 (s, 1H), 7.74 (d, *J* = 7.8 Hz, 1H), 7.68 (d, *J* = 8.1 Hz, 1H), 7.56 (d, *J* = 3.2 Hz, 1H), 7.52 (d, *J* = 8.4 Hz, 1H), 7.47~7.36 (m, 4H), 7.32 (d, *J* = 7.0 Hz, 2H), 7.25 (t, *J* = 7.6 Hz, 1H), 7.17 (d, *J* = 8.4 Hz), 7.08 (t, *J* = 7.5 Hz, 1H), 6.55 (d, *J* = 3.1 Hz, 1H). <sup>13</sup>C NMR (100 MHz, DMSO-*d*<sub>6</sub>) δ 164.7, 151.6, 138.0, 135.9, 130.7, 128.7, 128.6, 127.7, 127.3, 126.4, 125.7, 122.5, 122.5, 122.3, 121.9, 121.2, 118.8, 114.4, 113.8, 102.0, 67.5. HRMS (ESI) *m/z* calcd for C<sub>22</sub>H<sub>16</sub>BrN<sub>3</sub>SNa<sup>+</sup> (M+Na)<sup>+</sup> 456.0141, found 456.0140.

***N*-((5-methyl-1*H*-indol-1-yl)(phenyl)methyl)benzo[*d*]thiazol-2-amine (3ae)**

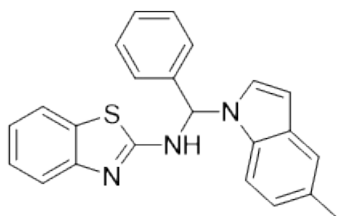

The target product **3ae** (28.8 mg, 78%) was synthesized as a white solid, mp: 188.0~189.0 °C. <sup>1</sup>H NMR (400 MHz, DMSO-*d*<sub>6</sub>) δ 9.45 (d, *J* = 8.1 Hz, 1H), 7.71 (t, *J* = 7.1 Hz, 1H), 7.60 (t, *J* = 7.1 Hz, 1H), 7.53 (t, *J* = 7.6 Hz, 1H), 7.43 (dd, *J* = 12.5, 4.1 Hz, 4H), 7.38 (d, *J* = 7.5 Hz, 2H), 7.30 (dd, *J* = 14.8, 7.1 Hz, 2H), 7.26 (s, 1H), 7.07 (t, *J* = 7.5 Hz, 1H), 6.91 (dd, *J* = 8.1 Hz, 1H), 6.41 (d, *J* = 3.1 Hz, 1H), 2.36 (s, 3H). <sup>13</sup>C NMR (100 MHz, DMSO-*d*<sub>6</sub>) δ 164.2, 151.4, 138.5, 134.5, 133.5, 130.1, 129.0, 128.6, 126.4, 125.8, 125.2, 122.8, 122.5, 122.3, 120.3, 119.5, 110.5, 101.1, 67.4, 21.2. HRMS (ESI) *m/z* calcd for C<sub>23</sub>H<sub>19</sub>N<sub>3</sub>SNa<sup>+</sup> (M+Na)<sup>+</sup> 392.1192, found 392.1193.

***N*-((6-methyl-1*H*-indol-1-yl)(phenyl)methyl)benzo[*d*]thiazol-2-amine (3af)**

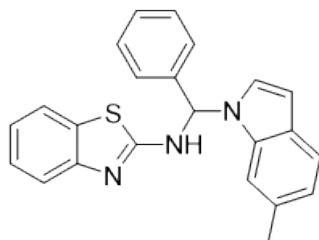

The target product **3af** (28.4 mg, 77%) was synthesized as a white solid, mp: 188.0~189.0 °C. <sup>1</sup>H NMR (400 MHz, DMSO-*d*<sub>6</sub>) δ 9.46 (d, *J* = 8.2 Hz, 1H), 7.73 (d, *J* = 7.7 Hz, 1H), 7.61 (d, *J* = 8.2 Hz, 1H), 7.44 (s, 1H), 7.42 (s, 1H), 7.41~7.33 (m, 5H), 7.30 (d, *J* = 7.0 Hz, 2H), 7.24 (t, *J* = 7.5 Hz, 1H), 7.07 (t, *J* = 7.4 Hz, 1H), 6.87 (d, *J* = 7.9 Hz, 1H), 6.45 (d, *J* = 2.7 Hz, 1H), 2.37 (s, 3H). <sup>13</sup>C NMR (100 MHz, DMSO-*d*<sub>6</sub>) δ 164.8, 151.7, 138.5, 135.6, 130.7, 130.5, 128.6, 128.4, 126.4, 126.0, 125.3, 121.7, 121.3, 121.2, 120.3, 118.8, 110.5, 101.6, 67.2, 21.6. HRMS (ESI) *m/z* calcd for C<sub>23</sub>H<sub>19</sub>N<sub>3</sub>SNa<sup>+</sup> (M+Na)<sup>+</sup> 392.1192, found 392.1192.

***N*-((5-methoxy-1*H*-indol-1-yl)(phenyl)methyl)benzo[*d*]thiazol-2-amine (3ag)**

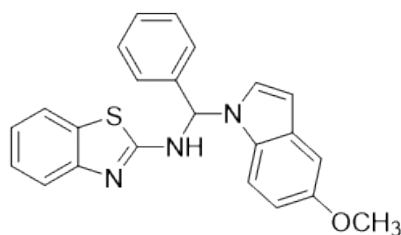

The target product **3ag** (33.3 mg, 85%) was synthesized as a white solid, mp: 188.0~189.0 °C. <sup>1</sup>H NMR (400 MHz, DMSO-*d*<sub>6</sub>) δ 9.48 (d, *J* = 8.3 Hz, 1H), 7.77~7.72 (m, 1H), 7.59 (d, *J* = 8.2 Hz, 1H), 7.48~7.43 (m, 2H), 7.42 (s, 1H), 7.41~7.35 (m, 3H), 7.33~7.26 (m, 2H), 7.26~7.22 (m, 1H), 7.12~7.05 (m, 2H), 6.76 (dd, *J* = 8.9, 2.4 Hz, 1H), 6.43 (d, *J* = 3.1 Hz, 1H), 3.74 (s, 3H). <sup>13</sup>C NMR (100 MHz, DMSO-*d*<sub>6</sub>) δ 165.2, 154.2, 152.2, 138.9, 131.1, 130.8, 129.6, 129.1, 128.9, 127.2, 126.9, 126.2, 122.3, 121.7, 119.3, 112.0, 111.9, 102.9, 101.8, 67.9, 55.8. HRMS (ESI) *m/z* calcd for C<sub>23</sub>H<sub>19</sub>N<sub>3</sub>OSNa<sup>+</sup> (M+Na)<sup>+</sup> 408.1141, found 408.1141.

***N*-((6-methoxy-1*H*-indol-1-yl)(phenyl)methyl)benzo[*d*]thiazol-2-amine (3ah)**

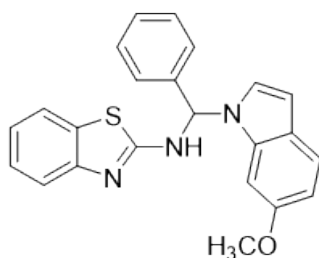

The target product **3ah** (33.3 mg, 85%) was synthesized as a white solid, mp: 188.0~189.0 °C. <sup>1</sup>H NMR (400 MHz, DMSO-*d*<sub>6</sub>) δ 9.49 (d, *J* = 8.4 Hz, 1H), 7.74 (d, *J* = 7.2 Hz, 1H), 7.64 (d, *J* = 8.4 Hz, 1H), 7.45 (d, *J* = 2.7 Hz, 1H), 7.44~7.38 (m, 4H), 7.36 (t, *J* = 5.8 Hz, 3H), 7.29 (t, *J* = 3.3 Hz, 1H), 7.28~7.22 (m, 1H), 7.18 (d, *J* = 1.8 Hz, 1H), 7.12~7.05 (m, 1H), 6.70 (dd, *J* = 8.6, 2.2 Hz, 1H), 6.42 (d, *J* = 3.2 Hz, 1H), 3.72 (s, 3H). <sup>13</sup>C NMR (100 MHz, DMSO-*d*<sub>6</sub>) δ 165.4, 156.1, 138.8, 136.5, 131.1, 129.1, 127.0, 126.2, 125.3, 122.2, 122.0, 121.7, 121.6, 119.2, 109.9, 102.2, 95.2, 67.6, 55.8. HRMS (ESI) *m/z* calcd for C<sub>23</sub>H<sub>19</sub>N<sub>3</sub>OSNa<sup>+</sup> (M+Na)<sup>+</sup> 408.1141, found 408.1141.

## 6. $^1\text{H}$ and $^{13}\text{C}$ NMR spectra for all compounds

### *N*-((1*H*-indol-1-yl)(phenyl)methyl)benzo[*d*]thiazol-2-amine (3aa)

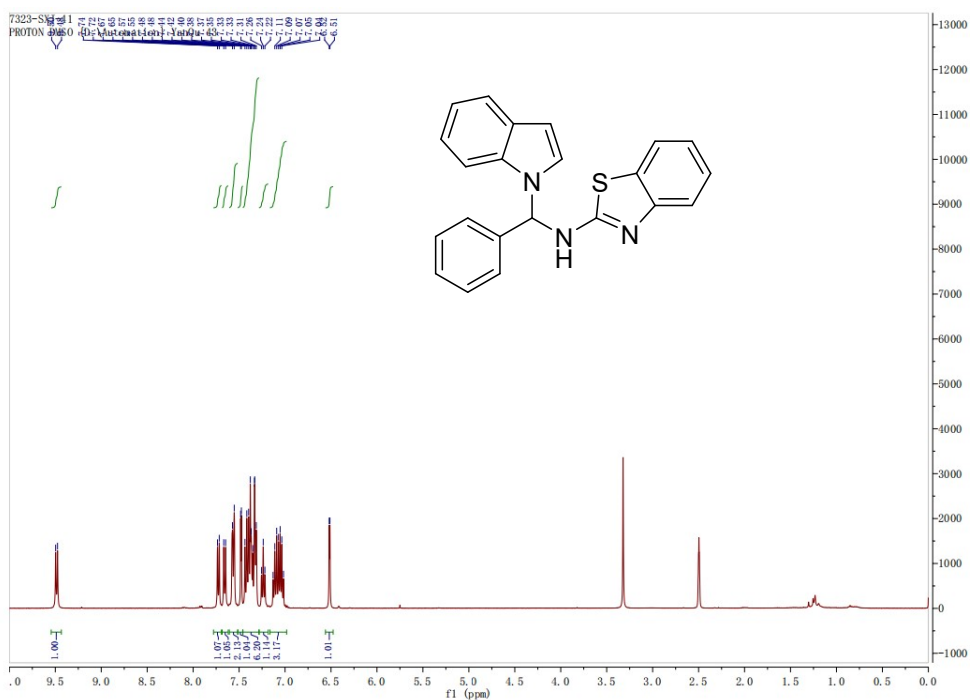

$^1\text{H}$  NMR (400 MHz,  $\text{DMSO-}d_6$ )

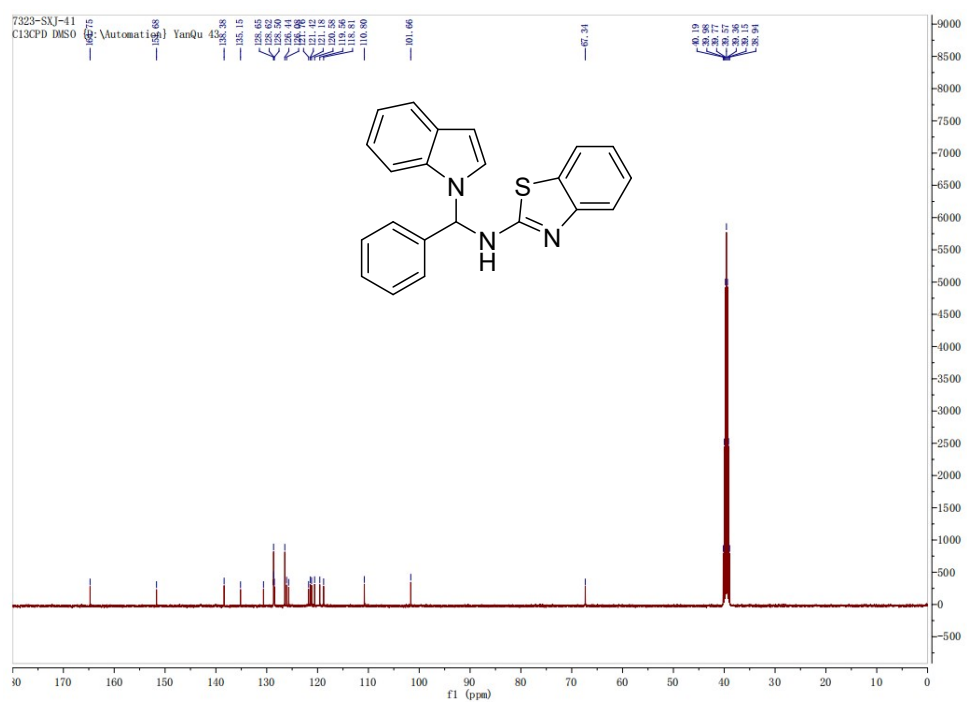

$^{13}\text{C}$  NMR (100 MHz,  $\text{DMSO-}d_6$ )







***N*-((3-fluorophenyl)(1*H*-indol-1-yl)methyl)benzo[*d*]thiazol-2-amine (3ea)**

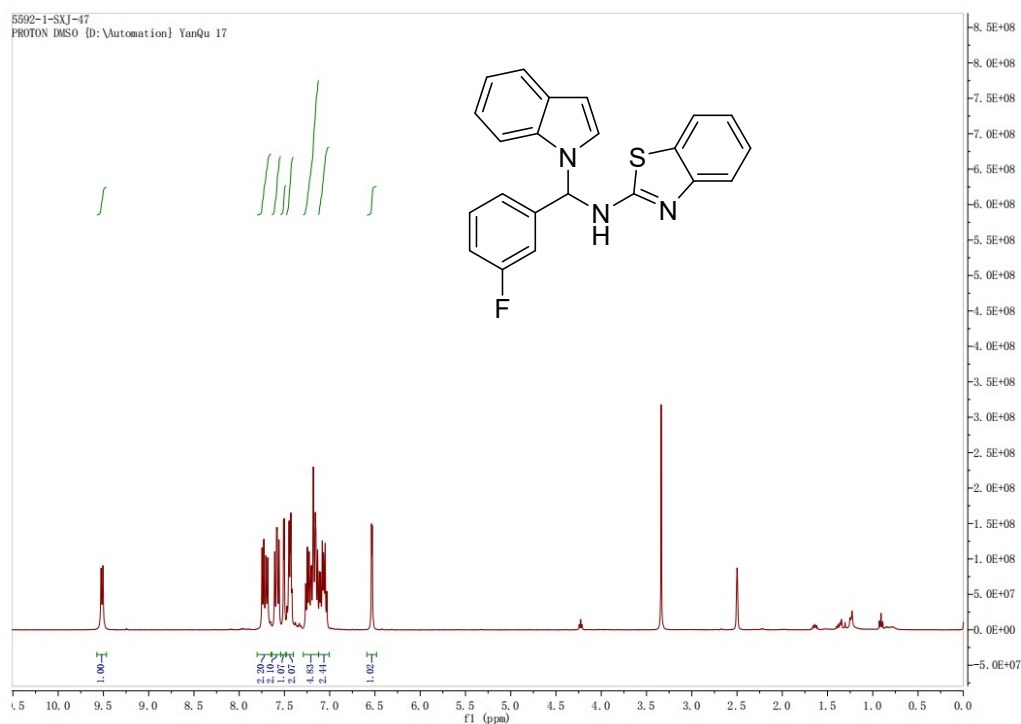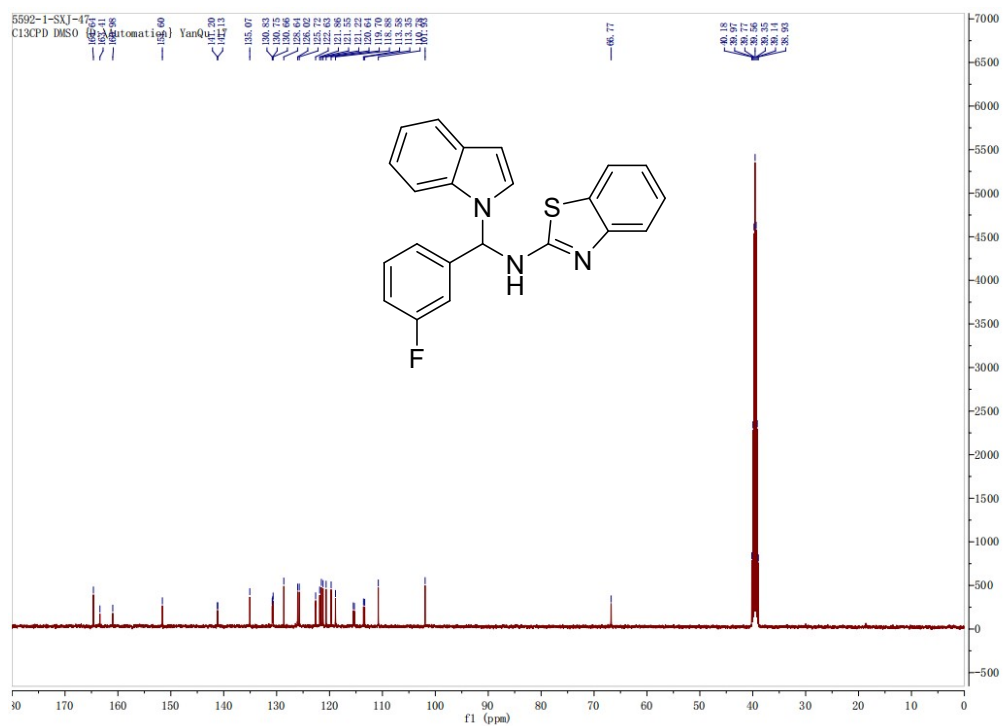











***N*-((1*H*-indol-1-yl)(*p*-tolyl)methyl)benzo[*d*]thiazol-2-amine (3ka)**

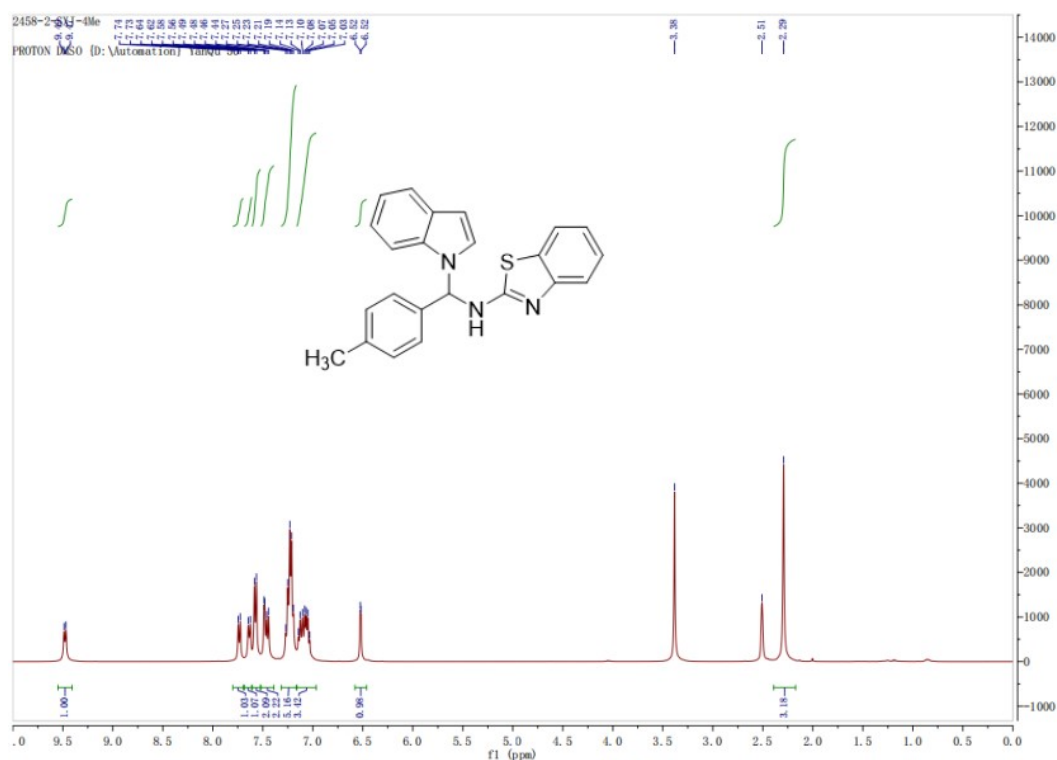

<sup>1</sup>H NMR (400 MHz, DMSO-*d*<sub>6</sub>)

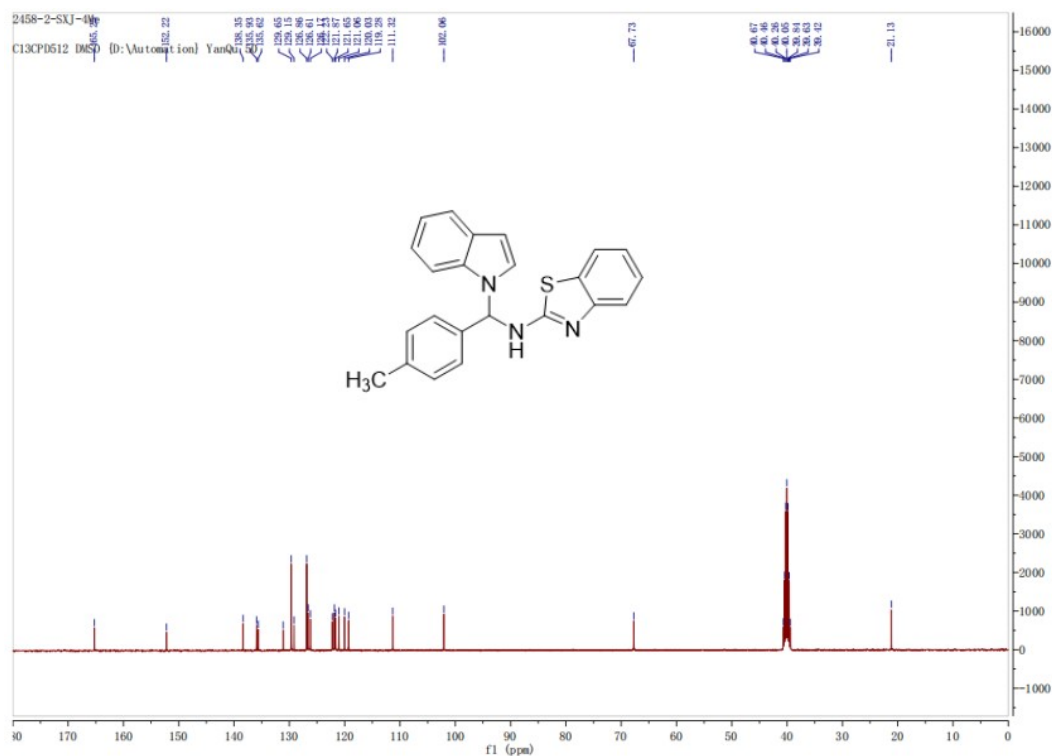

***N*-((1*H*-indol-1-yl)(thiophen-2-yl)methyl)benzo[*d*]thiazol-2-amine (31a)**

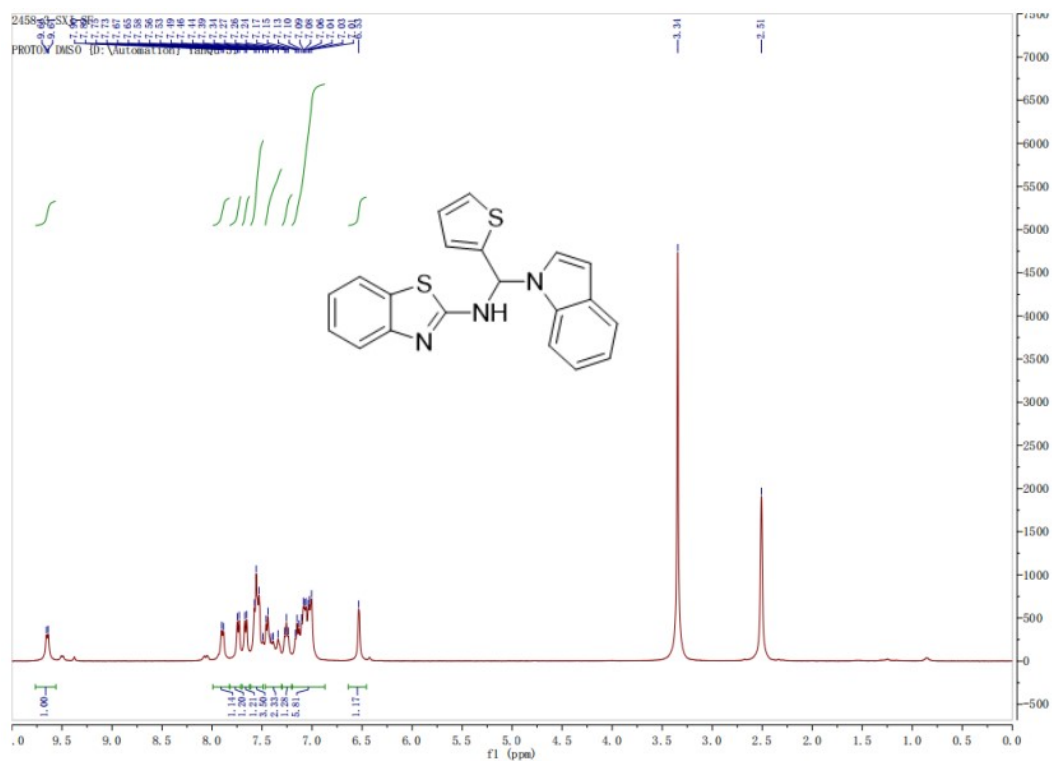

$^1\text{H}$  NMR (400 MHz,  $\text{DMSO-}d_6$ )

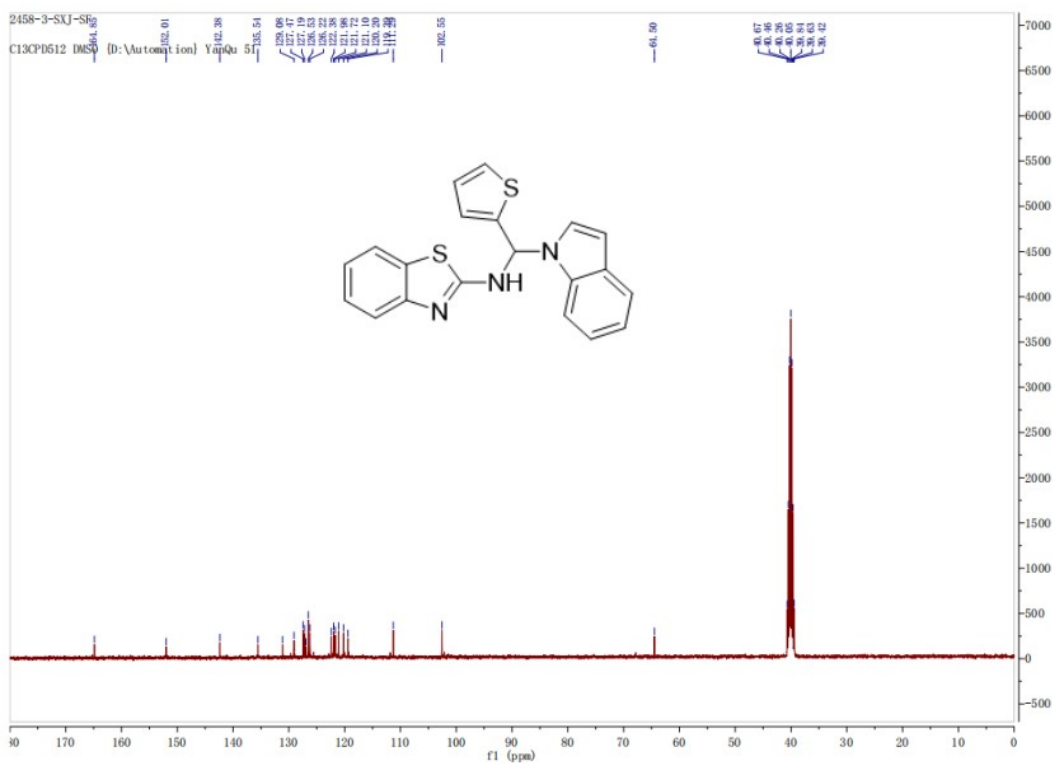

$^{13}\text{C}$  NMR (100 MHz,  $\text{DMSO-}d_6$ )

***N*-((1*H*-indol-1-yl)(phenyl)methyl)-6-chlorobenzo[*d*]thiazol-2-amine (3ma)**

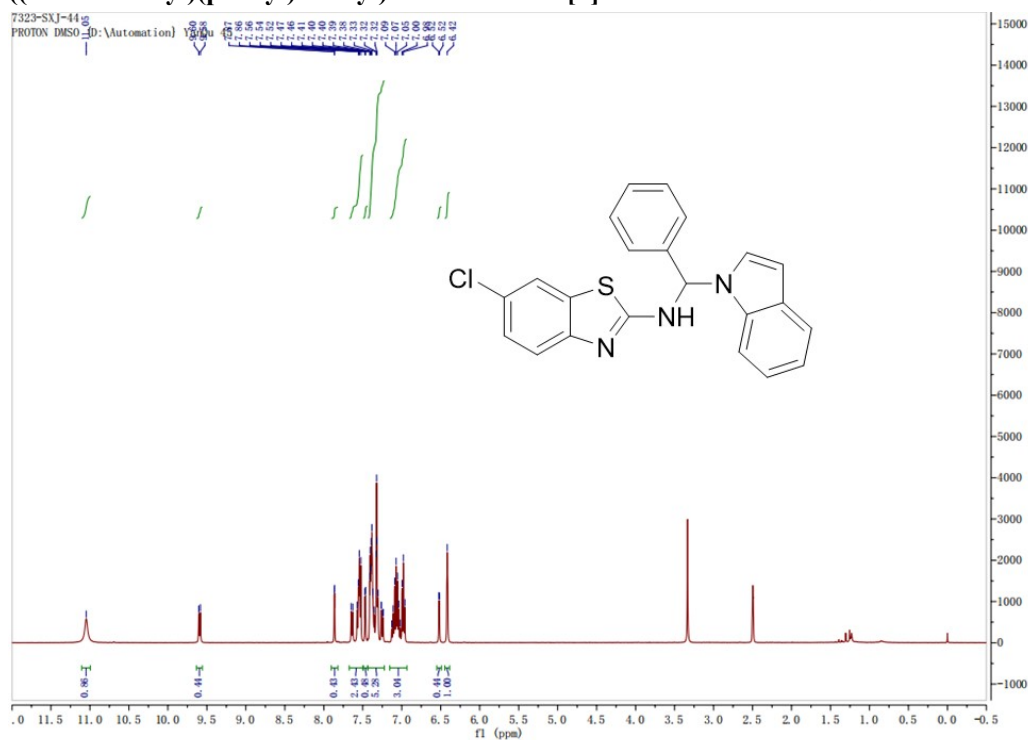

<sup>1</sup>H NMR (400 MHz, DMSO-*d*<sub>6</sub>)

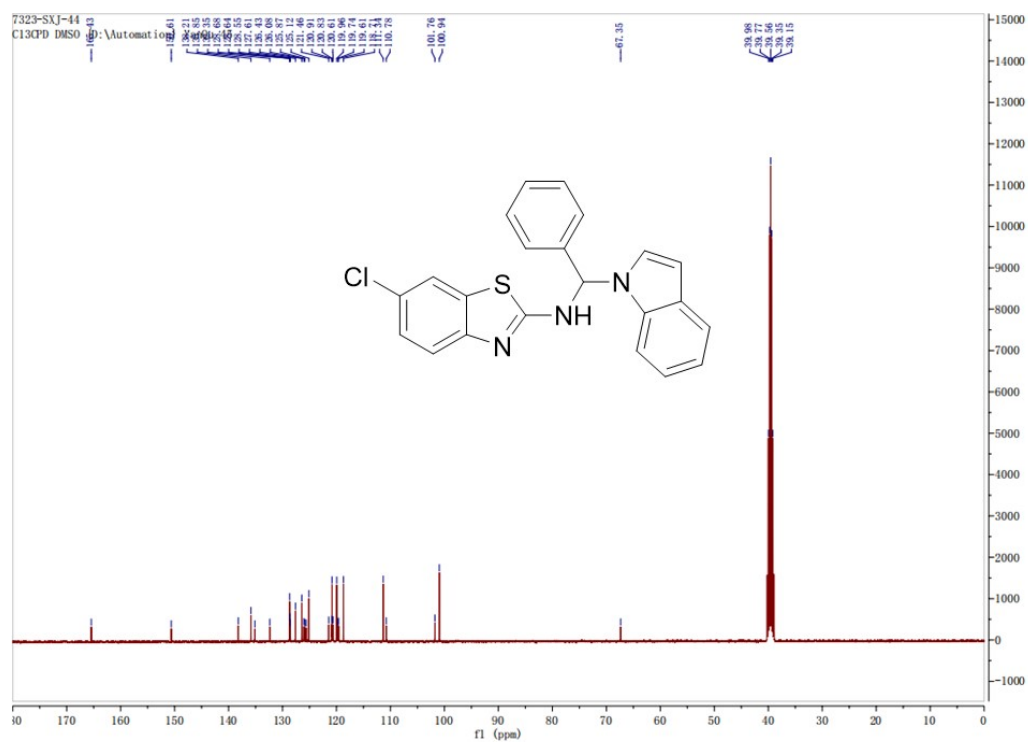

<sup>13</sup>C NMR (100 MHz, DMSO-*d*<sub>6</sub>)

***N*-((1*H*-indol-1-yl)(phenyl)methyl)-6-methoxybenzo[*d*]thiazol-2-amine (3na)**

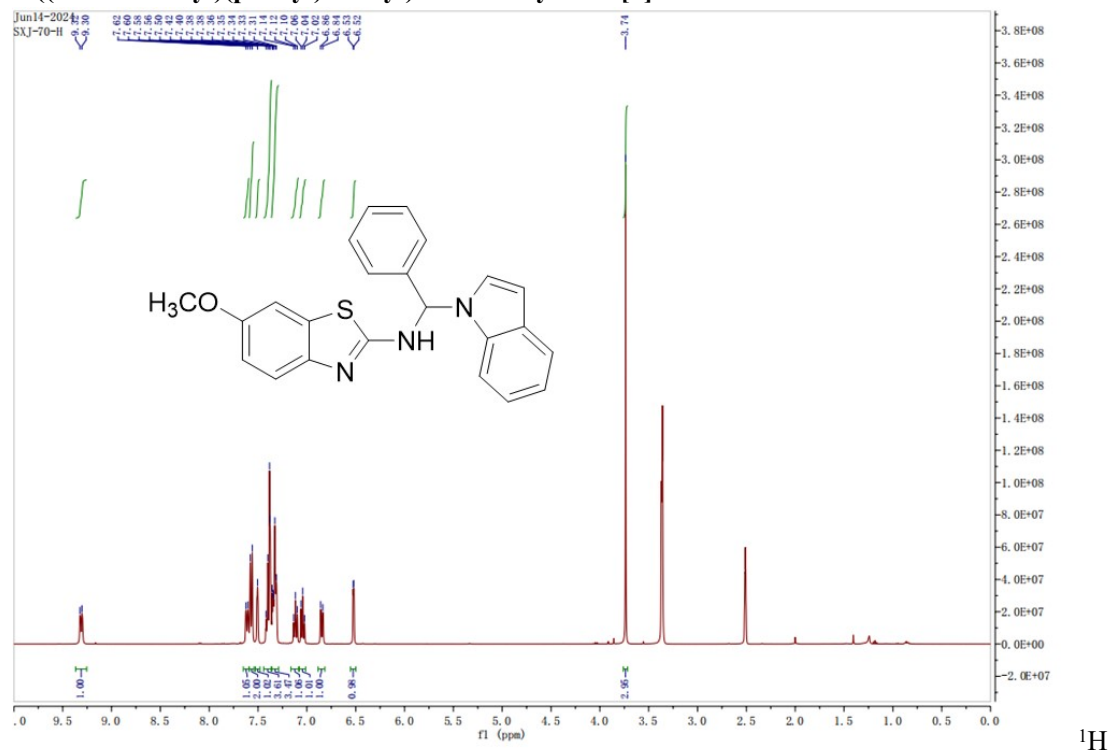

<sup>1</sup>H NMR (400 MHz, DMSO-*d*<sub>6</sub>)

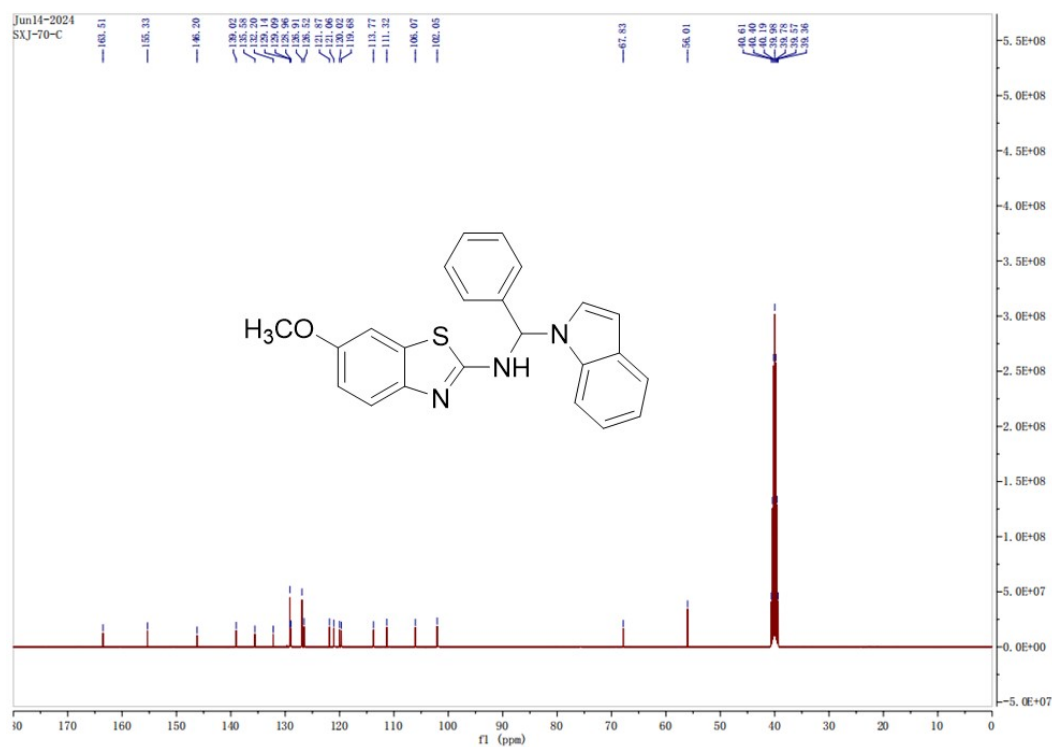

<sup>13</sup>C NMR (100 MHz, DMSO-*d*<sub>6</sub>)
